# Supplementary material
Source: PubMed Central journal article supplement (PMC4694105)
Supplement: chest_144_1_24_ds01.pdf [file chest_144_1_24_ds01.pdf]

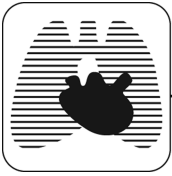

### Posttraumatic Stress Disorder in Survivors of Acute Lung Injury

#### Evaluating the Impact of Event Scale-Revised

O. Joseph Bienvenu, MD, PhD; Jason B. Williams, MD; Andrew Yang, BS; Ramona O. Hopkins, PhD; and Dale M. Needham, MD, PhD

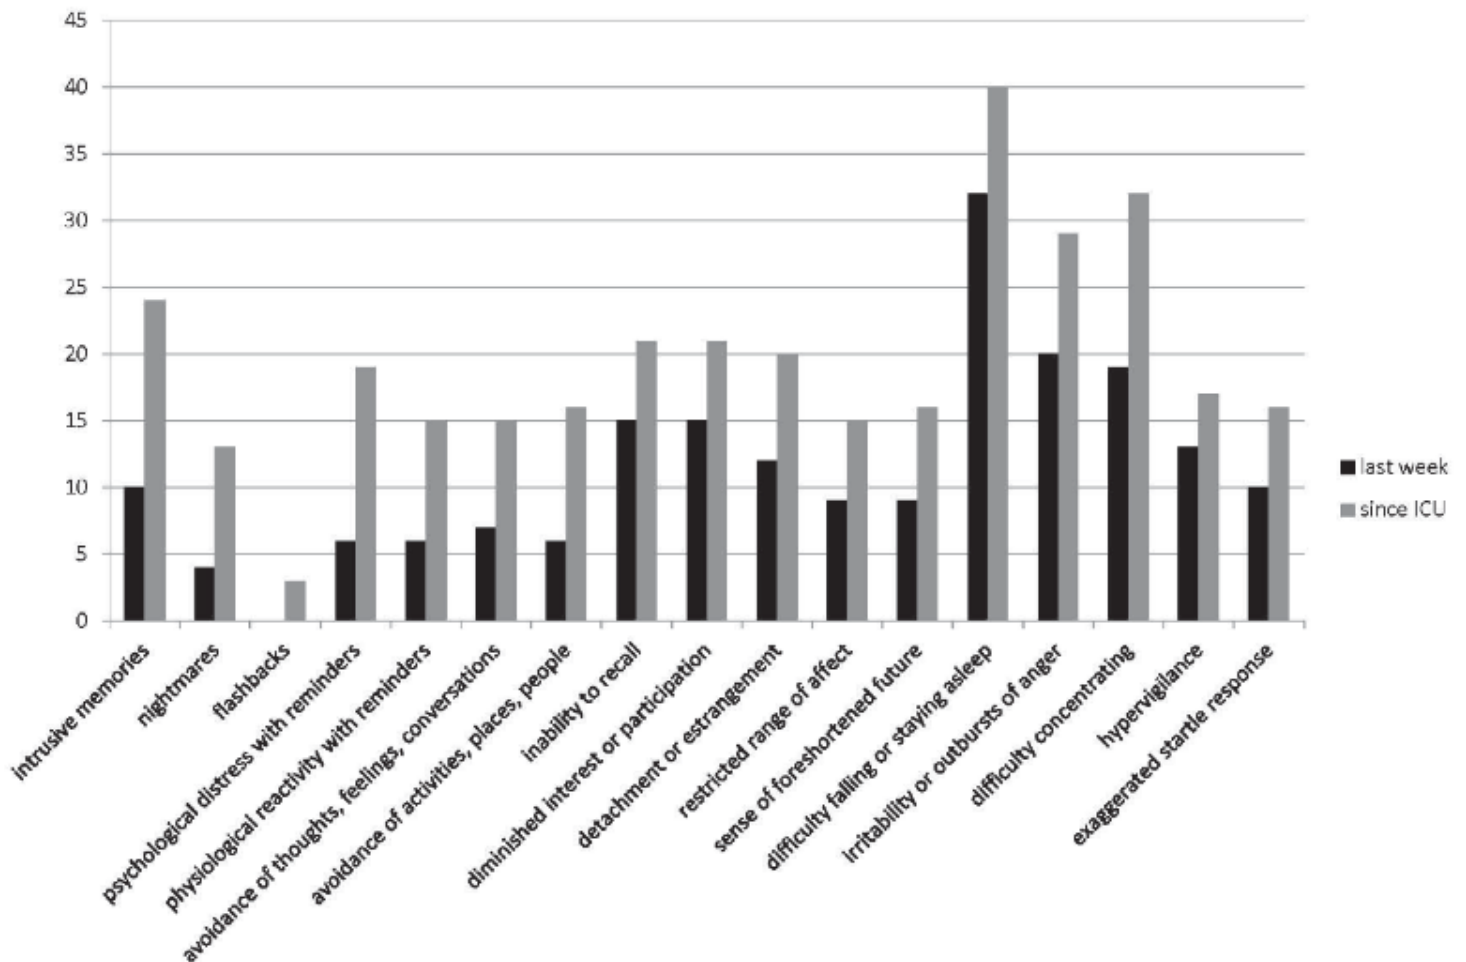

**e-Figure 1.** Proportion of patients with individual Clinician-Administered PTSD Scale symptoms in the last week and since acute lung injury/ICU (n=60).

Online supplements are not copyedited prior to posting.
